# Supplementary material for: Halorotetin A: A Novel Terpenoid Compound Isolated from Ascidian Halocynthia rotetzi Exhibits the Inhibition Activity on Tumor Cell Proliferation
Source: MDPI journal article supplement (doi:10.3390/md21010051), 2023-01-12
Supplement: s1 [file s1]

## Supplementary materials

# Halorotetin A: A Novel Terpenoid Compound Isolated from Ascidian *Halocynthia rotetzi* Exhibits the Inhibition Activity on Tumor Cell Proliferation

Jianhui Li <sup>1,†</sup>, Shanhao Han <sup>1,†</sup>, Yuting Zhu <sup>1</sup> and Bo Dong <sup>1,2,3,\*</sup>

<sup>1</sup> Fang Zongxi Center, MoE Key Laboratory of Marine Genetics and Breeding,  
College of Marine Life Sciences, Ocean University of China, Qingdao 266003,  
China;

<sup>2</sup> Laoshan Laboratory, Qingdao 266237, China

<sup>3</sup> Institute of Evolution & Marine Biodiversity, Ocean University of China,  
Qingdao 266003, China

\* Correspondence

† These authors contribute equally to this work.

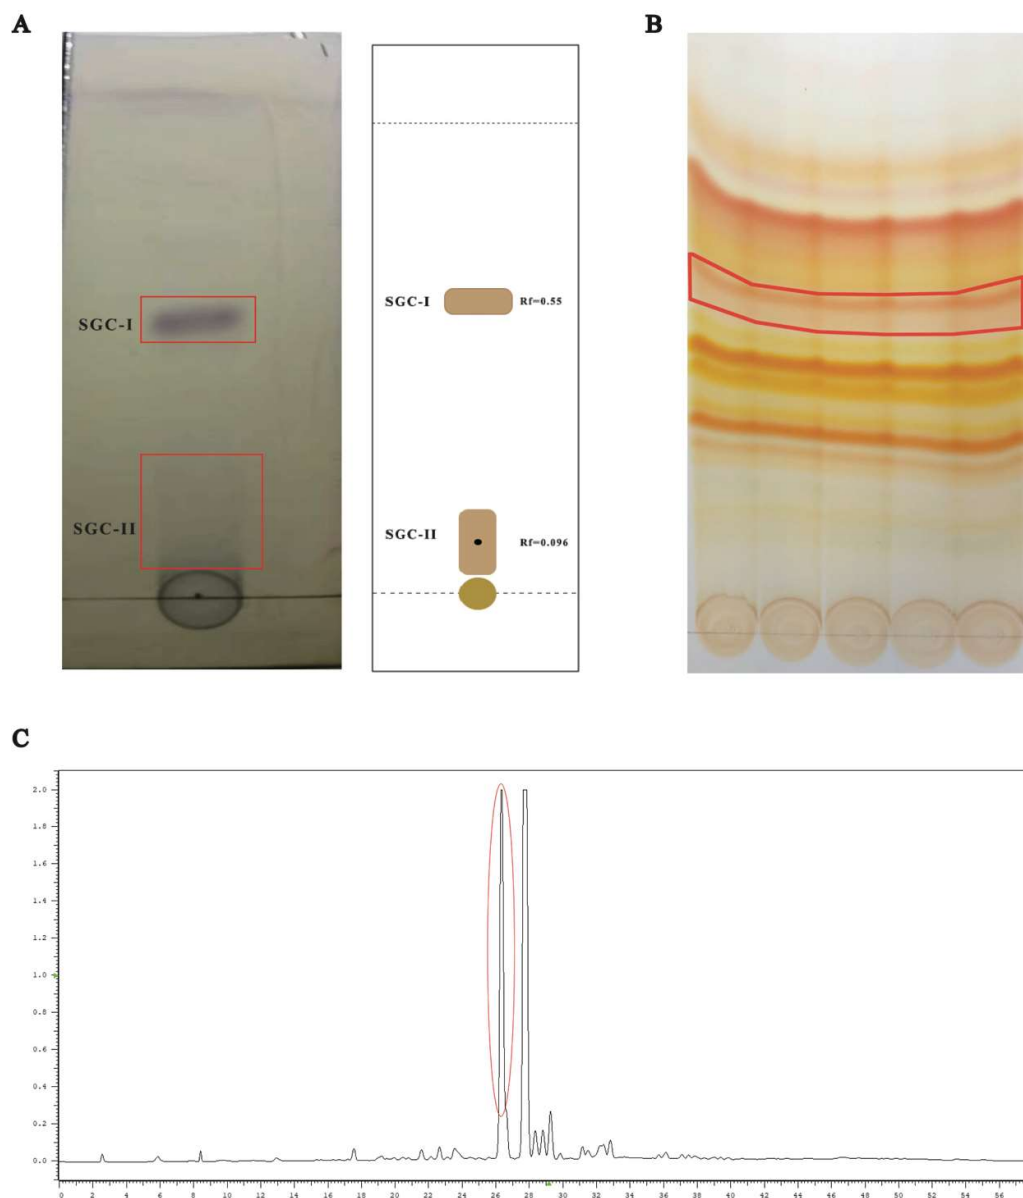

Figure S1. Isolation and activity verification of Halorotetin A. **(A)** The two parts of TE obtained by silica gel column chromatography, the SGC-II was the active part. **(B)** The different parts of SGC-II obtained by PLC separation, and the PCL-VI was exhibited in the red circle. **(C)** The different parts of PLC-VI obtained by semipreparative-HPLC, and the Halorotetin A was exhibited in the red circle.

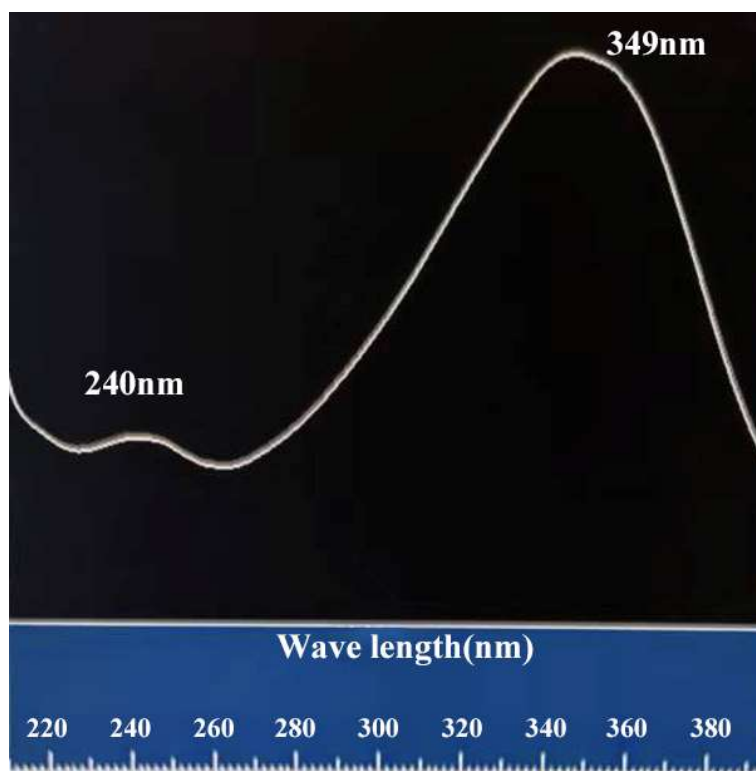

Figure S2. UV curve of Halorotetin A in Methanol

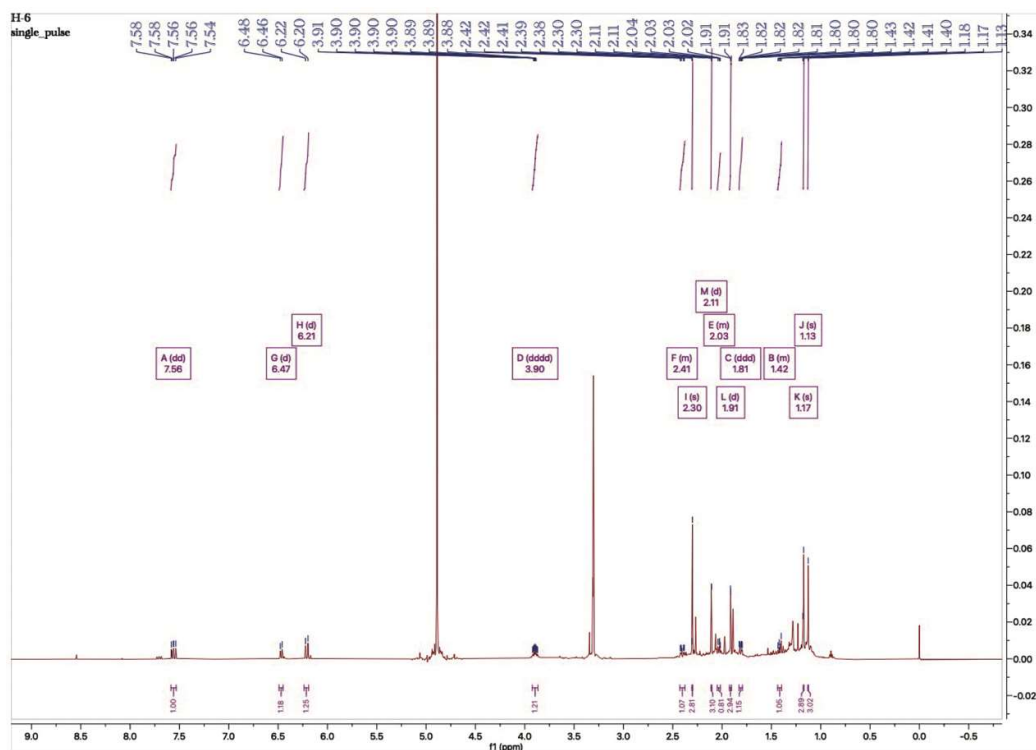

Figure S3.  $^1\text{H}$  NMR spectrum of Halorotetin A in Methanol- $d_4$

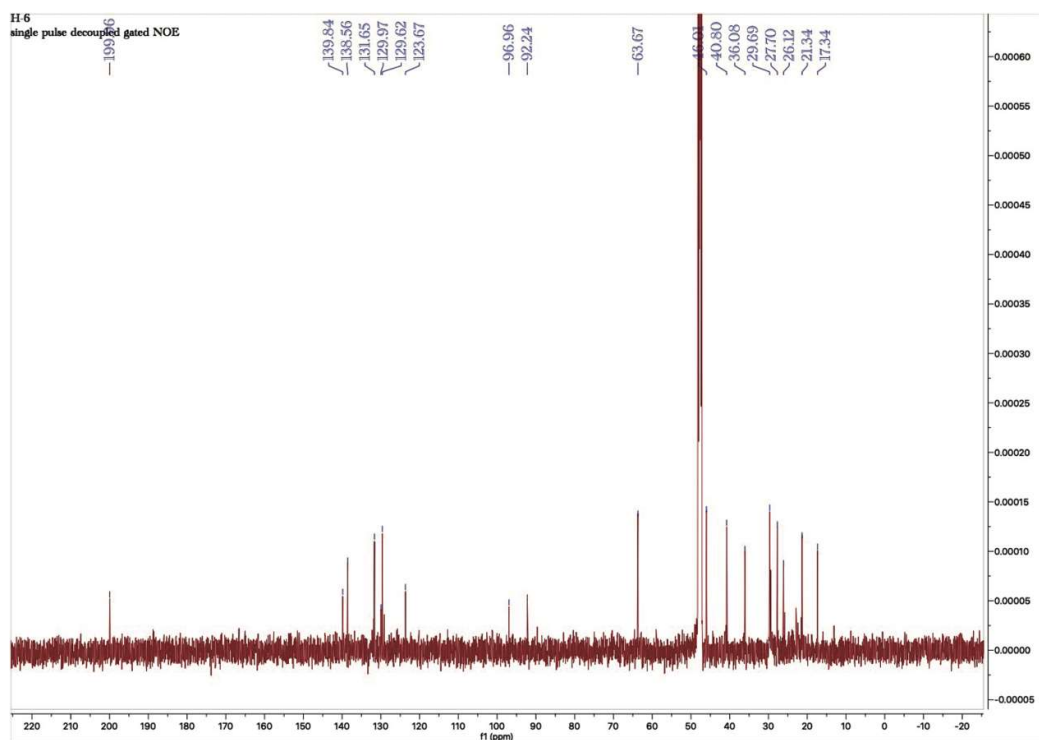

Figure S4.  $^{13}\text{C}$  NMR spectrum of Halorotetin A in Methanol- $d_4$

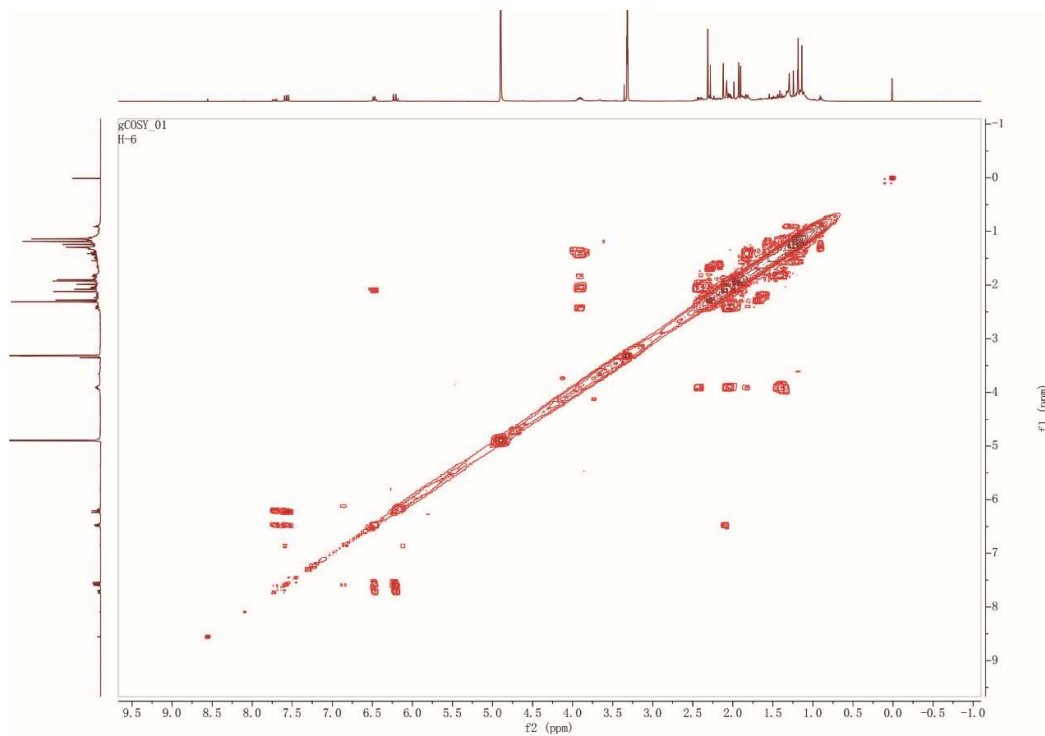

Figure S5.  $^1\text{H}$ - $^1\text{H}$  COSY spectrum of Halorotetin A in Methanol- $d_4$

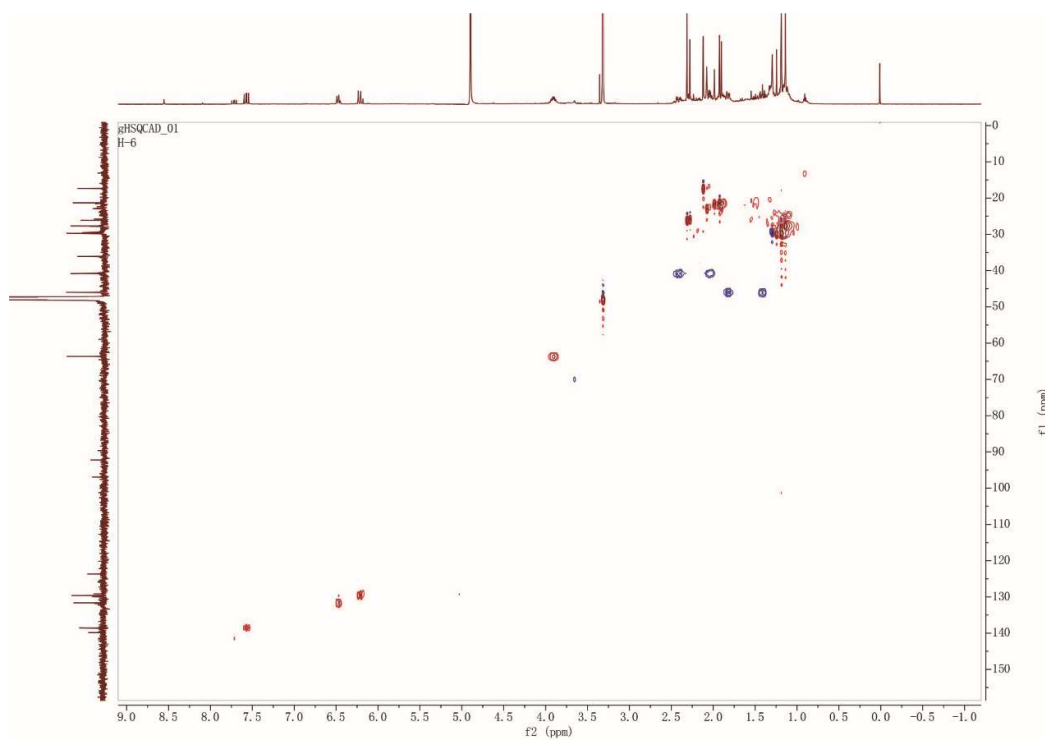

Figure S6. HSQC spectrum of Halorotetin A in Methanol- $d_4$

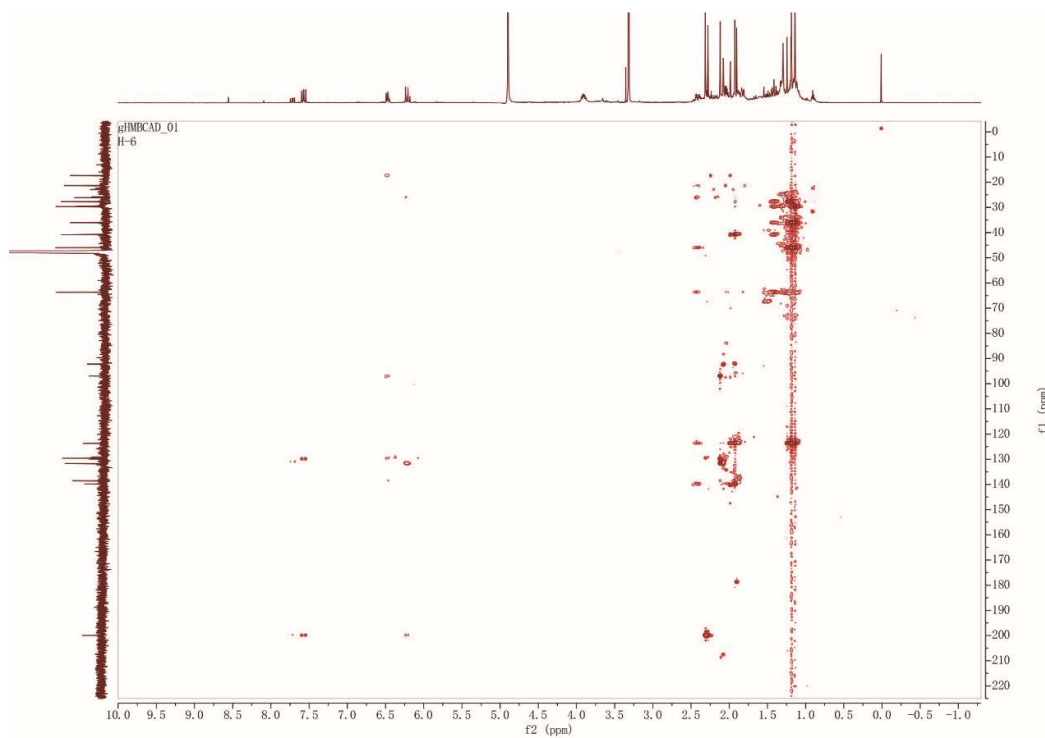

Figure S7. HMBC spectrum of Halorotetin A in Methanol- $d_4$

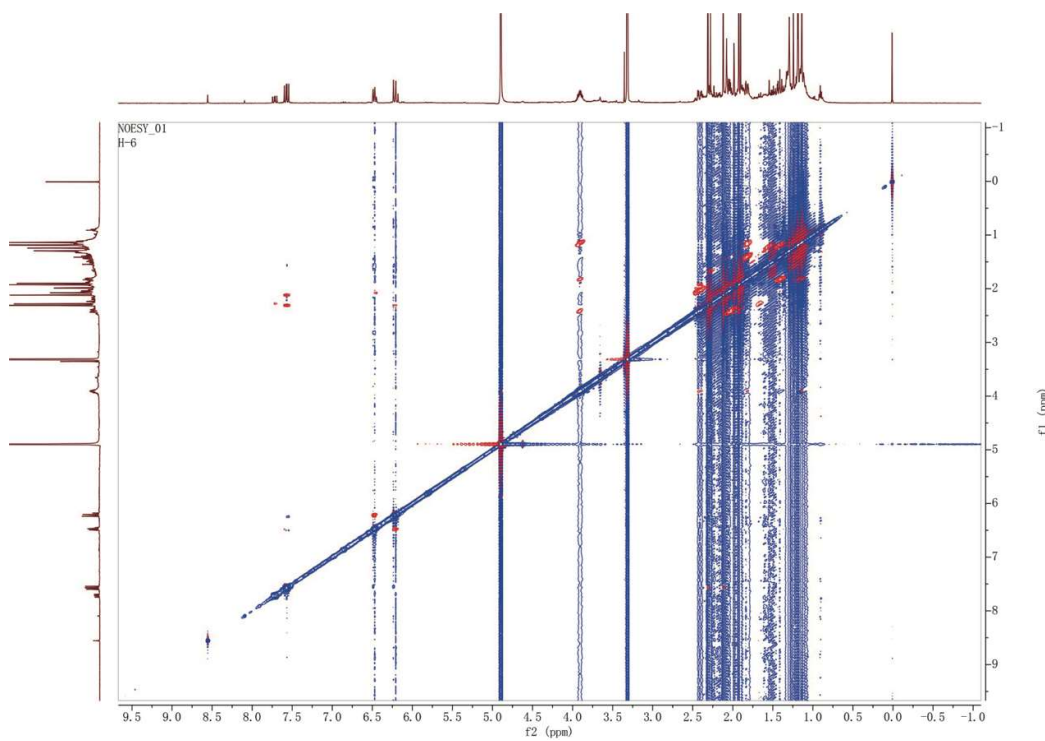

Figure S8. NOESY spectrum of Halorotetin A in Methanol- $d_4$

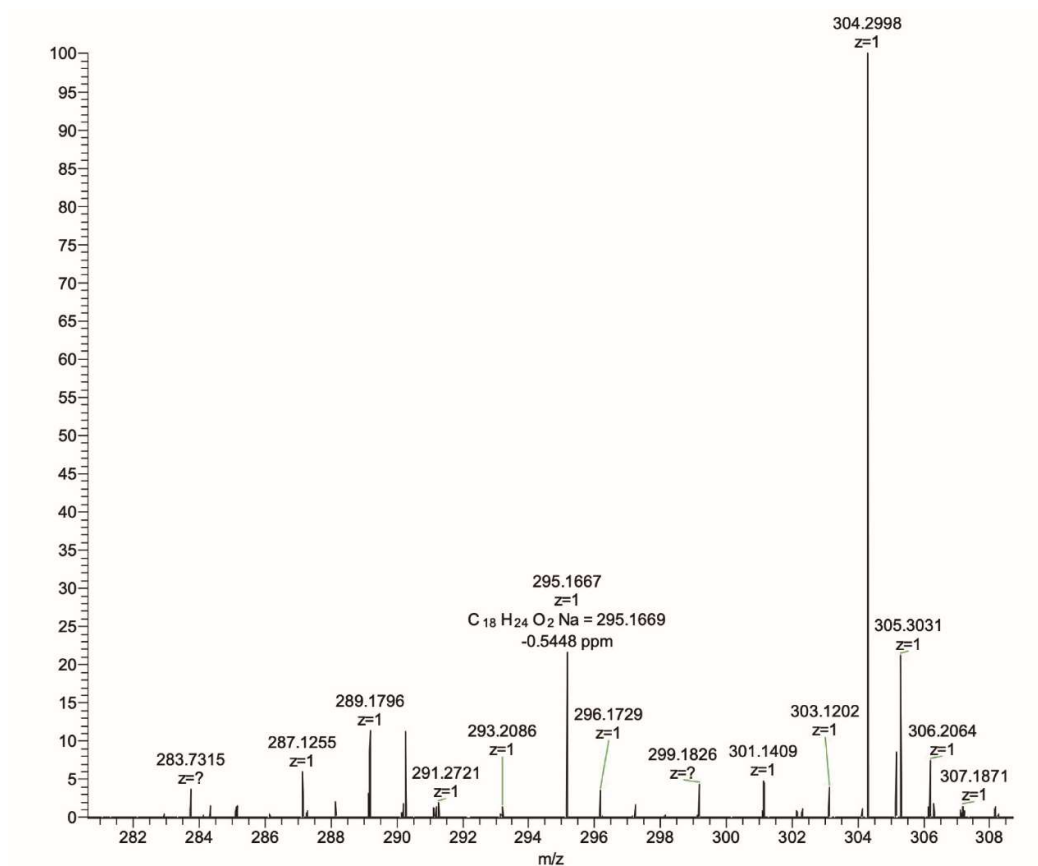

Figure S9. HRESIMS  $[M+Na]^+$  spectrum of Halorotetin A

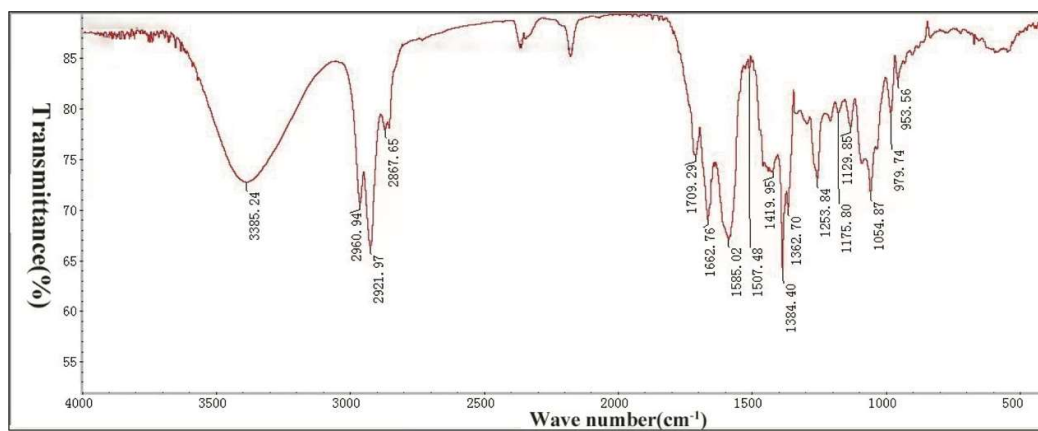

Figure S10. Infrared absorption (IR) spectrum of Halorotetin A

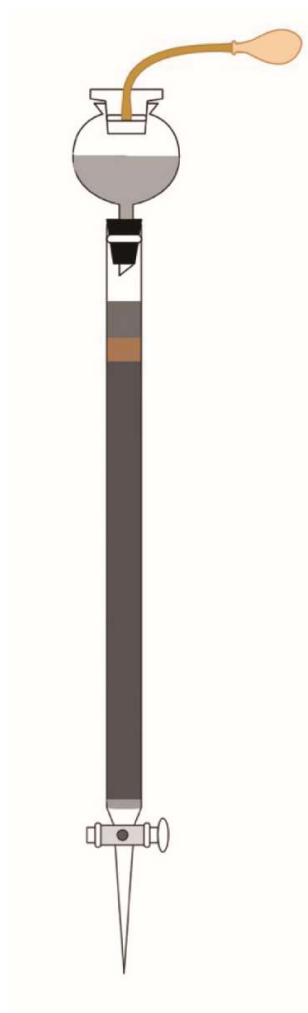

Figure S11. Schematic representation of the silica gel column (24mm×600mm). From top to bottom, the 60-80 mesh silica gel layer, the sample layer, and the 300-400 mesh silica gel layer, respectively.

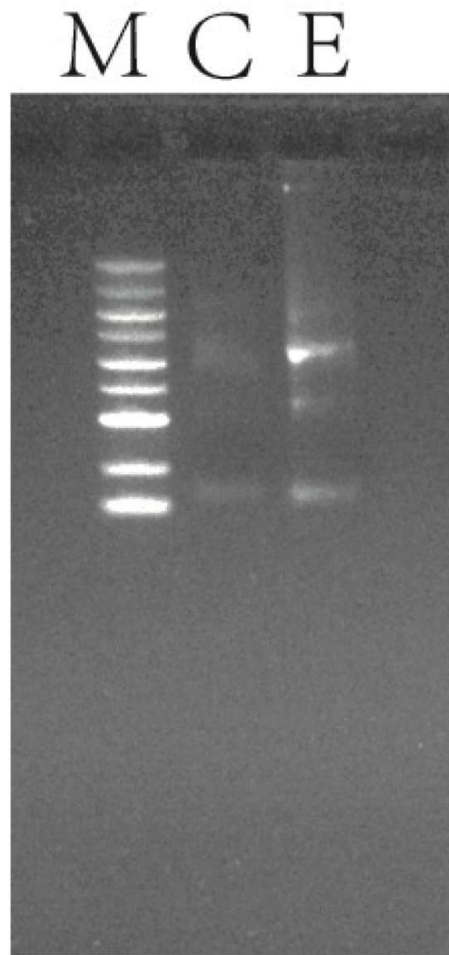

Figure S12. RNA electrophoresis pattern. The RNA was extracted from HepG-2 cells in the control group and the experimental group. RNA quality was determined by 1% agarose gel electrophoresis. M represents Maker, C represents RNA from the control group, and E represents RNA from the experimental group.

Table S1. The protocol of HPLC for Halorotetin A

| Time (min) | A Pump<br>(Acetonitrile) | B Pump (Water) | Flow Velocity |
|------------|--------------------------|----------------|---------------|
| 0.0        | 20                       | 80             | 2ml/min       |
| 10         | 50                       | 50             |               |
| 25         | 70                       | 30             |               |
| 40         | 100                      | 0              |               |
| 55         | 100                      | 0              |               |
| 60         | 100                      | 0              |               |

Table S2. Primers used for qRT-PCR analysis

|        |                                                               |
|--------|---------------------------------------------------------------|
| P1K3CA | Forward: TGTTACTCAAGAAGCAGAA<br>Reverse: GCCTACTGGTTCAATTACT  |
| PTEN   | Forward: ACGAACTGGTGTAAATGATAT<br>Reverse: TGTCTCTGGTCCTTACTT |
| AXIN   | Forward: CCTATCCCTCCTTCCTTA<br>Reverse: GGCAGGTATCCAGATATG    |
| ARID1A | Forward: AAGGAGATTGGTGGATTG<br>Reverse: GACACTGGATATACTGCTT   |
| C-Myc  | Forward: AACAGAAGATGAGGAAGAA<br>Reverse: AGAAGGTGATCCAGACTC   |
| C-Met  | Forward: TCAGCGATCTTCTCTACT<br>Reverse: CCTCATCATCAGCGTTAT    |
| TP53   | Forward: CGTGTGGAGTATTTGGAT<br>Reverse: ATGTAGTTGTAGTGGATGG   |
| KEAP1  | Forward: GACAAACCGCCTTAATTC<br>Reverse: CAGCAGCATAGATACAGT    |
| ARID2  | Forward: ATGTATCTCCTGCTCCTT<br>Reverse: CCACAGTATGAACACCTT    |
